RESEARCH ARTICLE

# The impact of antenatal care, iron–folic acid supplementation and tetanus toxoid vaccination during pregnancy on child mortality in Bangladesh

Tanvir Abir<sup>1</sup>, Felix Akpojene Ogbo<sup>2</sup>, Garry John Stevens<sup>3</sup>, Andrew Nicolas Page<sup>2</sup>, Abul Hasnat Milton<sup>4</sup>, Kingsley Emwinyore Agho<sup>1\*</sup>

**1** School of Science and Health, Western Sydney University, Penrith, New South Wales, Australia, **2** Translational Health Research Institute (THRI), School of Medicine, Western Sydney University, Penrith, New South Wales, Australia, **3** Humanitarian and Development Research Initiative (HADRI), Western Sydney University, School of Social Science and Psychology, Penrith, New South Wales, Australia, **4** Centre for Clinical Epidemiology & Biostatistics (CCEB), School of Medicine and Public Health, Faculty of Health and Medicine, The University of Newcastle, Callaghan, New South Wales, Australia

\* [k.agho@westernsydney.edu.au](mailto:k.agho@westernsydney.edu.au)

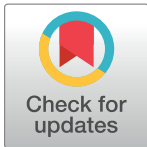

**OPEN ACCESS**

**Citation:** Abir T, Ogbo FA, Stevens GJ, Page AN, Milton AH, Agho KE (2017) The impact of antenatal care, iron–folic acid supplementation and tetanus toxoid vaccination during pregnancy on child mortality in Bangladesh. *PLoS ONE* 12(11): e0187090. <https://doi.org/10.1371/journal.pone.0187090>

**Editor:** Jacobus P. van Wouwe, TNO, NETHERLANDS

**Received:** May 16, 2017

**Accepted:** October 15, 2017

**Published:** November 1, 2017

**Copyright:** © 2017 Abir et al. This is an open access article distributed under the terms of the [Creative Commons Attribution License](https://creativecommons.org/licenses/by/4.0/), which permits unrestricted use, distribution, and reproduction in any medium, provided the original author and source are credited.

**Data Availability Statement:** The study used the Bangladesh Demographic and Health Survey (BDHS) data sets. The surveys were approved by the Ethics Committee of the ICF International, USA and the National Research Ethics Committee of Bangladesh Medical Research Council (BMRC), Bangladesh. We obtained approval from Measure DHS to download and use the data for this study. The data sets are available to apply for online at <https://dhsprogram.com/data/available-datasets.cfm>.

## Abstract

### Background

Appropriate antenatal care (ANC) is an important preventive public health intervention to ensure women’s and newborn health outcomes. The study aimed to investigate the impact of ANC, iron–folic acid (IFA) supplementation and tetanus toxoid (TT) vaccination during pregnancy on child mortality in Bangladesh.

### Method

A cross-sectional study of three datasets from the Bangladesh Demographic and Health Surveys for the years 2004, 2007 and 2011 were pooled and used for the analyses. A total weighted sample of 16,721 maternal responses (5,364 for 2004; 4,872 for 2007 and 6,485 for 2011) was used. Multivariate logistic models that adjusted for cluster and sampling weights were used to examine the impact of ANC, IFA supplementation and TT vaccination during pregnancy on the death of a child aged 0–28 days (neonatal), 1–11 months (post-neonatal) and 12–59 months (child).

### Results

Multivariable analyses revealed that the odds of postnatal and under-5 mortality was lower in mothers who had ANC [Odds Ratio (OR) = 0.60, 95% confidence interval (95% CI): 0.43–0.85], IFA supplementation [OR = 0.66, 95% CI: (0.45–0.98)] and ≥2 TT vaccinations (OR = 0.43, 95% CI: 0.49–0.78) for post-natal mortality; and for under-5 mortality, any form of ANC (OR = 0.69, 95% CI: 0.51–0.93), IFA supplementation (OR = 0.67, 95% CI: 0.48–0.94) and ≥2 TT vaccinations (OR = 0.50, 95% CI: 0.36–0.69). When combined, TT

**Funding:** This study received no specific grant from any funding agency in the public, commercial or not-for-profit sectors.

**Competing interests:** The authors have declared that no competing interests exist.

vaccination with IFA supplementation, and TT vaccination without IFA supplementation were protective across all groups.

## Conclusion

The study found that ANC, IFA supplementation, and TT vaccination during pregnancy reduced the likelihood of child mortality in Bangladesh. The findings suggest that considerable gains in improving child survival could be achieved through ensuring universal coverage of ANC, promoting TT vaccination during pregnancy and IFA supplementation among pregnant women in Bangladesh.

## Introduction

Child mortality is an important public health issue worldwide, and often reflects a country's developmental status because it serves as a good indicator for antenatal care, delivery and early postnatal care as well as the health status of children [1]. Globally, the risk of child mortality is highest during the early neonatal period (the first six days of life), accounting for 15% of all under-five mortality (U5M), highlighting the significance of appropriate antenatal care, safe delivery practices and effective postnatal care. In 2015, approximately 2.6 million neonatal deaths were reported, despite a 42% decrease since 1990 [1]. Global policy attention and scale up efforts such as the Millennium Development Goals (MDGs) that focused on key aspects of improving child survival and health have played a major role in the reduction of childhood-related diseases (including diarrhoea, tetanus and measles), with subsequent impact on child mortality [1, 2]. Despite this improvement, child mortality remains a major health issue in resource-constrained communities in sub-Saharan Africa and South Asia countries, including Bangladesh [1].

Notably, most of the neonatal deaths are due to preventable diseases (such as infections and intrapartum-related complications) [1] in which appropriate access to basic and affordable interventions such as perinatal care could play a major role [3]. Studies have shown that mothers can increase the survival and health of their babies by attending antenatal care (ANC), being immunised against tetanus, and being provided with iron-folic acid (IFA) supplementation and health promotion messages such as exclusive breastfeeding [2, 4, 5].

In Bangladesh, small-scale studies have investigated the efficacy of ANC attendance and IFA supplementation in the prevention of U5M. For example, West et al. revealed that multiple antenatal micronutrients and IFA supplementation did not decrease all-cause infant mortality, but reduced the prevalence of stillbirths and preterm births [6]. In addition, Pervin et al. reported that ANC was associated with improved perinatal survival in a regional area of Bangladesh [7]. The limitation of these studies is that they were conducted in regional areas of Bangladesh, and the findings may be limited in informing country-wide interventions at the national level. A recent population-based study reported improvement in the utilisation of appropriate ANC (more than four visits) in Bangladesh between 1994 and 2014, with associated inequities across the socio-demographic scale and regional areas of Bangladesh [8]. The study did not examine the impact of ANC, IFA supplementation and tetanus toxoid (TT) vaccination during pregnancy on child mortality, which is the focus of the current study.

Maternal TT vaccination during pregnancy was incorporated into the World Health Organisation's Expanded Program on Immunization (EPI) in the mid-1970s to prevent child mortality from tetanus and has become a standard approach to ANC [9]. Although the impact of

ANC TT vaccination on child mortality has been documented [9–11], a recent systematic review indicated that only a few studies provided supporting evidence for the initiative, reflecting the dearth of data in many developing countries [9]. The paucity of evidence base for ANC TT vaccination and child mortality warrants investigation in a resource-poor country such as Bangladesh to continue advocacy for initiatives to improve child survival and extend the longevity of life.

This study aimed to investigate the impact of ANC, IFA supplementation and TT vaccination during pregnancy on child mortality in Bangladesh, using the Bangladesh Demographic and Health Survey Data (BDHS, 2004–2011). Evidence from this study will inform stakeholders in Bangladesh to advocate and intensify efforts for preventive health programmes to ensure improvement in child health outcomes.

## Methods

### Data sources

Data sets from the BDHS for the years 2004, 2007 and 2011 were pooled and used for the analyses. [12–14]. The BDHS collects socio-demographic characteristics, maternal and child health information from a nation-wide representative sample of households. The data were collected by the National Institute of Population Research and Training (NIPRT), with technical support from Inner City Fund (ICF) International and Measure DHS, using a two-stage sampling method and standardised household questionnaires. Maternal and child health information were obtained from eligible women aged 15–49 years in each household surveyed. A total weighted sample of 16,721 maternal responses (5,364 for 2004; 4,872 for 2007 and 6,485 for 2011) was used for this study, with an average response rate of 98%. The 2014 BDHS datasets were not incorporated into the analyses because information on TT vaccination during pregnancy was not collected from respondents. Additional information on the BDHS methodological strategy for data collection has been described in detail elsewhere [12–14].

### Study outcome

The outcome variable for the study was child mortality, which comprises neonatal (death within 0–28 days), post-neonatal (death from 1 to 11 months) and child (death between 12 and 59 months) mortalities.

### Main exposure variables

The main variables for the study comprise ANC, IFA supplementation and TT vaccination during pregnancy. ANC services may include offering maternal health education, physical examination of the pregnant woman, IFA supplementation and TT vaccination. The impact of each exposure variable and different combinations of ANC, IFA supplementation and TT vaccination on child mortality was investigated in the study.

### Study factors

The study adapted the Mosley and Chen model for determinants of child mortality [15]. We identified four main variables in the current study: (i) Community-level factors [place of residence (rural/urban) and administrative region]; (ii) Socio-economic determinants (maternal marital status, maternal religion, maternal age at the time of the survey, maternal age at the time of birth of the child, parents' working status, maternal body mass index (BMI), parents' level of education, household wealth index, maternal access to the mass media: radio, television and newspaper/magazine); (iii) Proximate determinants (gender of baby, birth rank and

interval, maternal desire for pregnancy); and (iv) Pregnancy or delivery at health-care service, use of ANC services, including IFA supplementation, use of TT during pregnancy; place and mode of delivery of baby and type of delivery assistance received.

All households across the three surveys were ranked by using the household wealth index, which was constructed by NIPRT and Measure DHS by apportioning weights to three characteristics of households. These included: the type of floor and wall; access to electricity; and six household assets; namely, possession of radio, television, bicycle, motorcycle, car and fridge.

## Statistical analysis

Frequency tabulations were used to describe characteristics of the study population. Logistic regression models were used to perform analysis to determine the unadjusted and adjusted odds ratios (ORs) for determinants of neonatal, post-neonatal and U5M. In addition, the independent effect of each variable after other covariates were controlled for, was investigated in multivariate analyses.

The modelling was performed in 2 stages. Firstly, a significance level of 0.05 was used to remove all factors not significant among the various variables (community-level and socio-economic). This was done by performing a backward stepwise elimination procedure. Regardless of their level of significance, the year of the survey and maternal age at birth of the child were retained in the final model [16]. Secondly, ANC, mode of delivery, place of delivery and type of skilled delivery assistance were assessed, after controlling for significant community and socio-economic variables. The type of skilled delivery assistance has been known to have a protective effect on child mortality [17]. Consequently, this variable was retained in the final model, regardless, other non-significant variables were removed. ANC was found to be correlated with both IFA supplementation and TT vaccination. Hence, the study then examined the effect of a combination of any form of ANC and IFA supplementation, as well as a combination of IFA and TT vaccination on neonatal, post-neonatal and under-5 mortality.

The ORs and corresponding 95% confidence interval for neonatal, post-neonatal and U5M, and each study factor were examined and reported. The statistical software package Stata version 12 (Stata Corporation, College Station, USA) was used for all statistical analyses. The 'svy' command was used to adjust for sampling weights and the cluster survey design.

## Ethics approval

The study was based on the analyses of existing survey datasets that are available to apply for online, with all identifier information removed. The surveys were approved by the Ethics Committee of the ICF International, USA and the National Research Ethics Committee of Bangladesh Medical Research Council (BMRC), Bangladesh. We obtained approval from Measure DHS to download and use the data for this study.

## Results

### Characteristics of the study population

The study was based on a total weighted sample of 16,722 eligible women. As shown in Table 1, there was a variation in child mortality in the administrative regions of Bangladesh, with the lowest and highest mortality occurring in the Barisal (6.4%) and Dhaka (32.9%) regions, respectively. Less than 1 in 5 families had both parents in paid employment in the 12 months preceding the survey, and nearly 50% of mothers had no schooling and were from poor households. More than three-quarters of mothers gave birth at home, and nearly one-third delivered their babies with assistance from traditional birth attendants.

**Table 1. Characteristics of the study participants (n = 16722) in Bangladesh (2004–2011).**

| Variable                                      | n*    | %*   |
|-----------------------------------------------|-------|------|
| <b>Year of survey</b>                         |       |      |
| 2004                                          | 5364  | 32.1 |
| 2007                                          | 4872  | 29.1 |
| 2011                                          | 6485  | 38.8 |
| <b>Community</b>                              |       |      |
| <b>Place of residence</b>                     |       |      |
| Urban                                         | 3739  | 22.4 |
| Rural                                         | 12983 | 77.6 |
| <b>Region</b>                                 |       |      |
| Barisal                                       | 1067  | 6.4  |
| Chittagong                                    | 3697  | 22.1 |
| Dhaka                                         | 5497  | 32.9 |
| Khulna                                        | 1804  | 10.8 |
| Rajshahi                                      | 3377  | 20.2 |
| Sylhet                                        | 1278  | 7.6  |
| <b>Socioeconomics</b>                         |       |      |
| <b>Maternal marital status</b>                |       |      |
| Married                                       | 16367 | 97.9 |
| Formerly Married (divorced/separated/widowed) | 354   | 2.1  |
| <b>Religion</b>                               |       |      |
| Islam                                         | 15382 | 92.0 |
| Other                                         | 1339  | 8.0  |
| <b>Mother's age at interview</b>              |       |      |
| 15–24 years                                   | 8273  | 49.5 |
| 25–34 years                                   | 6772  | 40.5 |
| 35–49 years                                   | 1670  | 10.0 |
| <b>Mother's age at child's birth</b>          |       |      |
| less than 20 years                            | 5019  | 30.0 |
| 20–29 years                                   | 8921  | 53.4 |
| 30–39 years                                   | 2560  | 15.3 |
| 40+ years                                     | 221   | 1.3  |
| <b>Mother working status</b>                  |       |      |
| Not working                                   | 13509 | 80.8 |
| Working                                       | 3210  | 19.2 |
| <b>Mother BMI</b>                             |       |      |
| ≥ 18,5                                        | 3929  | 23.7 |
| 18–25                                         | 11019 | 65.9 |
| 25+                                           | 1708  | 10.4 |
| <b>Parents employment status</b>              |       |      |
| Father only working                           | 13119 | 78.5 |
| Both working                                  | 2998  | 17.9 |
| Neither working                               | 604   | 3.6  |
| <b>Maternal education</b>                     |       |      |
| No education                                  | 7818  | 46.8 |
| Primary                                       | 7010  | 41.9 |
| Secondary or above                            | 1882  | 11.3 |
| <b>Paternal education</b>                     |       |      |
| No education                                  | 8512  | 50.9 |

(Continued)

**Table 1.** (Continued)

| Variable                                                   | n*    | %*   |
|------------------------------------------------------------|-------|------|
| primary                                                    | 5331  | 31.9 |
| Secondary or above                                         | 2861  | 17.2 |
| <b>Household wealth Index</b>                              |       |      |
| Rich                                                       | 2921  | 17.5 |
| Middle                                                     | 5991  | 35.8 |
| Poor                                                       | 7810  | 46.7 |
| <b>Watches television every week</b>                       |       |      |
| Yes                                                        | 9484  | 56.7 |
| No                                                         | 7234  | 43.3 |
| <b>Listens to radio every week</b>                         |       |      |
| Yes                                                        | 4259  | 25.5 |
| No                                                         | 12458 | 74.5 |
| <b>Read newspaper</b>                                      |       |      |
| Yes                                                        | 2620  | 15.7 |
| No                                                         | 14099 | 84.3 |
| <b>Proximate</b>                                           |       |      |
| <b>Gender</b>                                              |       |      |
| Female                                                     | 8173  | 48.9 |
| Male                                                       | 8549  | 51.1 |
| <b>Birth rank and birth interval</b>                       |       |      |
| 2nd/3rd birth rank, more than 2 years interval             | 6438  | 38.5 |
| 1st birth rank"                                            | 5241  | 31.4 |
| 2nd/3rd birth rank, less than or equal to 2 years interval | 1110  | 6.6  |
| 4th birth rank, more than 2 years interval                 | 3267  | 19.5 |
| 4th birth rank, less than or equal to 2 years interval     | 665   | 4.0  |
| <b>Desire for pregnancies</b>                              |       |      |
| Current                                                    | 11625 | 69.5 |
| Later                                                      | 2598  | 15.6 |
| Not at all                                                 | 2497  | 14.9 |
| <b>Pregnancy or delivery health-care service</b>           |       |      |
| <b>Use of antenatal care</b>                               |       |      |
| Not used                                                   | 6679  | 39.9 |
| Used                                                       | 10035 | 60.1 |
| <b>IFA Supplements</b>                                     |       |      |
| No                                                         | 11039 | 66.2 |
| Yes                                                        | 5476  | 32.8 |
| <b>TT vaccination during pregnancy</b>                     |       |      |
| Never                                                      | 3573  | 21.4 |
| One TT                                                     | 3731  | 22.3 |
| 2+ TT                                                      | 9385  | 56.3 |
| <b>§Combined place and mode of delivery</b>                |       |      |
| Health facilities without Caesarean                        | 1153  | 6.9  |
| Health facilities with Caesarean                           | 1482  | 8.9  |
| Home                                                       | 13663 | 81.7 |
| <b>§Delivery assistance</b>                                |       |      |
| None                                                       | 195   | 1.2  |
| Doctor                                                     | 2561  | 15.3 |

(Continued)

**Table 1.** (Continued)

| Variable                  | n*   | %*   |
|---------------------------|------|------|
| Nurse/midwife             | 1054 | 6.3  |
| TBA                       | 5505 | 32.9 |
| Other untrained personnel | 5986 | 35.8 |

\*Weighted for the sampling probability;

IFA: iron-folic acid supplementation; TT: tetanus toxoid; TBA: traditional birth attendance;

§Variables with missing data

<https://doi.org/10.1371/journal.pone.0187090.t001>

## Factors associated with neonatal, postnatal and child mortality

Neonatal mortality was significantly associated with high maternal BMI ( $25\text{kgm}^{-2}$  or higher) compared to low maternal BMI ( $18.5\text{kgm}^{-2}$  or lower) (Table 2). Mothers with education were less likely to experience neonatal, postnatal and child deaths compared to mothers with no schooling. Postnatal mortality was significantly associated with infants of older mothers (aged  $\geq 40$  years) compared to those of younger mothers (aged  $<20$  years). Employed mothers were significantly more likely to experience child mortality compared to mothers not in employment. The odds of a mother experiencing child mortality were higher among 4<sup>th</sup> born infants/children where there was an interval of 2 years or less with the preceding child.

The likelihood of a mother experiencing neonatal mortality was significantly higher among mothers who received no IFA supplements and had less than two TT vaccinations compared to those who had no IFA supplements but had more than two ANC TT vaccinations (Table 3). The odds of postnatal and child mortality were significantly higher among infants/children whose mothers received no IFA supplements and had less than 2 ANC TT vaccinations compared to those whose mothers received more than two ANC TT vaccinations, irrespective of whether they also received IFA supplementation. Mothers who had ANC visits and received IFA supplements were significantly less likely to experience postnatal and child deaths compared to those who had no ANC visits and received no IFA supplements.

Neonates whose mothers received no ANC TT vaccinations were significantly more likely to die compared to those whose mothers had more than two ANC TT vaccinations (Fig 1). The likelihood of postnatal and child mortality was significantly higher among infants/children whose mothers attended no ANC clinics, did not receive IFA supplements and TT vaccinations during pregnancy.

## Discussion

In the current study, we found that the provision of any form of ANC intervention led to a reduction of the likelihood of postnatal and child mortality (but not neonatal mortality) in Bangladesh. In particular, IFA supplementation and TT vaccinations during pregnancy, two key components of ANC were found to be protective against infant/child mortality, reflecting the importance of ANC in improving maternal and child health outcomes.

Our study showed that there was a decline in child mortality between 2004 and 2011, consistent with findings from the GBD study 2015 [1] and United Nations MDG 2015 report [18]. The improvement in child health may be due to a number of global and national initiatives, including the WHO EPI [19], MDGs, national government policies and involvement of non-governmental organisations [20, 21]. We also found that IFA supplementation had a protective effect against neonatal, postnatal and child mortality. This finding is consistent with results of a reported trial of micronutrient supplementation during pregnancy in rural China in which



**Table 2. Multivariate analysis of community and socio-economic factors associated with neonatal, postnatal and child mortality in Bangladesh (2004–2011).**

| Variable                                                   | Neonatal mortality |         | Postnatal mortality |         | Child mortality   |         |
|------------------------------------------------------------|--------------------|---------|---------------------|---------|-------------------|---------|
|                                                            | AOR (95% CI)       | P-value | AOR (95% CI)        | P-value | AOR (95% CI)      | P-value |
| <b>Year of survey</b>                                      |                    |         |                     |         |                   |         |
| 2004                                                       |                    |         | 1.00                |         | 1.00              |         |
| 2007                                                       |                    |         | 0.74 (0.51, 1.08)   | 0.120   | 0.71 (0.51, 0.99) | 0.042   |
| 2011                                                       |                    |         | 0.58 (0.39, 0.86)   | 0.007   | 0.64 (0.45, 0.90) | 0.011   |
| <b>Place of residence</b>                                  |                    |         |                     |         |                   |         |
| Urban                                                      |                    |         |                     |         |                   |         |
| Rural                                                      |                    |         |                     |         |                   |         |
| <b>Region</b>                                              |                    |         |                     |         |                   |         |
| Barisal                                                    |                    |         |                     |         | 1.00              |         |
| Chittago                                                   |                    |         |                     |         | 0.90 (0.55, 1.48) | 0.680   |
| Dhaka                                                      |                    |         |                     |         | 0.85 (0.51, 1.40) | 0.519   |
| Khulna                                                     |                    |         |                     |         | 0.37 (0.18, 0.76) | 0.007   |
| Rajshahi                                                   |                    |         |                     |         | 0.80 (0.47, 1.36) | 0.419   |
| Sylhet                                                     |                    |         |                     |         | 1.24 (0.75, 2.03) | 0.396   |
| <b>Maternal marital status</b>                             |                    |         |                     |         |                   |         |
| Married                                                    |                    |         | 1.00                |         | 1.00              |         |
| Formerly Married                                           |                    |         | 2.97 (1.57, 5.63)   | 0.001   | 3.08 (1.82, 5.23) | <0.001  |
| <b>Maternal education</b>                                  |                    |         |                     |         |                   |         |
| No education                                               | 1.00               |         | 1.00                |         | 1.00              |         |
| Primary                                                    | 0.70 (0.53, 0.91)  | 0.007   | 0.64 (0.44, 0.94)   | 0.023   | 0.75 (0.54, 1.04) | 0.082   |
| Secondary or more                                          | 0.48 (0.31, 0.75)  | 0.001   | 0.19 (0.07, 0.52)   | 0.001   | 0.15 (0.06, 0.42) | <0.001  |
| <b>Mother employment status</b>                            |                    |         |                     |         |                   |         |
| Not working                                                |                    |         |                     |         | 1.00              |         |
| Working                                                    |                    |         |                     |         | 1.75 (1.28, 2.41) | 0.001   |
| <b>Mothers age at child's birth</b>                        |                    |         |                     |         |                   |         |
| Less than 20 years                                         |                    |         | 1.00                |         |                   |         |
| 20–29 years                                                |                    |         | 1.14 (0.67, 1.93)   | 0.632   |                   |         |
| 30–39 years                                                |                    |         | 1.45 (0.75, 2.81)   | 0.271   |                   |         |
| 40+ years                                                  |                    |         | 3.03 (1.18, 7.77)   | 0.021   |                   |         |
| <b>Mother BMI</b>                                          |                    |         |                     |         |                   |         |
| ≥ 18,5                                                     | 1.00               |         |                     |         |                   |         |
| 18–25                                                      | 0.99 (0.76, 1.31)  | 0.966   |                     |         |                   |         |
| 25+                                                        | 1.66 (1.11, 2.46)  | 0.013   |                     |         |                   |         |
| <b>Birth rank and birth interval</b>                       |                    |         |                     |         |                   |         |
| 2nd/3rd birth rank, more than 2 years interval             | 1.00               |         | 1.00                |         | 1.00              |         |
| 1st birth rank"                                            | 1.85 (1.38, 2.48)  | <0.001  | 1.25 (0.72, 2.15)   | 0.425   | 1.00 (0.68, 1.48) | 0.980   |
| 2nd/3rd birth rank, less than or equal to 2 years interval | 2.17 (1.43, 3.31)  | <0.001  | 0.92 (0.41, 2.08)   | 0.843   | 0.97 (0.52, 1.82) | 0.934   |
| 4th birth rank, more than 2 year interval                  | 1.25 (0.89, 1.77)  | 0.202   | 1.44 (0.89, 2.33)   | 0.142   | 1.40 (0.97, 2.03) | 0.071   |
| 4th birth rank, less than or equal to 2 years interval     | 1.99 (1.20, 3.29)  | 0.007   | 3.42 (1.98, 5.92)   | <0.001  | 2.99 (1.88, 4.76) | <0.001  |

BMI: Body mass index; AOR: Adjusted Odds ratio; Only significant data shown.

<https://doi.org/10.1371/journal.pone.0187090.t002>

neonatal mortality was reduced by 54% in mothers who received regular IFA supplementation compared to mothers who received only folic acid [22]. The benefits of IFA supplementation for neonatal mortality and pregnant women were highlighted in a study from Indonesia, [23] and other developing countries [24], respectively. These findings suggest that the provision of



**Table 3. Effects of iron-folic acid supplementation, tetanus toxoid vaccination during pregnancy and antenatal care on neonatal, postnatal and child mortality in Bangladesh (2004–2011).**

| Variable                                                     | Number of live births | Number of deaths | Unadjusted        |         | Adjusted          |         |
|--------------------------------------------------------------|-----------------------|------------------|-------------------|---------|-------------------|---------|
|                                                              |                       |                  | OR (95% CI)       | P value | AOR (95% CI)      | P value |
| <b>Neonatal Mortality (0–28 days)</b>                        |                       |                  |                   |         |                   |         |
| <b>Combination of IFA supplementation and TT vaccination</b> |                       |                  |                   |         |                   |         |
| No IFA supplements with < 2 TT injections                    | 5492                  | 117              | 1.00              |         | 1.00              |         |
| No IFA supplements with ≥ 2 TT injections                    | 5725                  | 93               | 0.65 (0.49, 0.86) | 0.003   | 0.62 (0.47, 0.83) | 0.001   |
| IFA supplements with < 2 TT injections                       | 1813                  | 33               | 0.84 (0.58, 1.22) | 0.364   | 0.77 (0.51, 1.15) | 0.202   |
| IFA supplements with ≥ 2 TT injections                       | 3660                  | 66               | 0.71 (0.52, 0.96) | 0.027   | 0.60 (0.42, 0.86) | 0.005   |
| <b>Combination of ANC and IFA supplementation</b>            |                       |                  |                   |         |                   |         |
| No ANC and no IFA supplements                                | 5663                  | 114              | 1.00              |         | 1.00              |         |
| ANC without IFA supplements                                  | 5577                  | 96               | 0.85 (0.65, 1.12) | 0.257   | 0.98 (0.73, 1.32) | 0.908   |
| IFA supplements alone                                        | 1015                  | 22               | 0.96 (0.59, 1.57) | 0.865   | 0.96 (0.58, 1.59) | 0.879   |
| ANC including IFA supplements                                | 4458                  | 78               | 0.82 (0.61, 1.10) | 0.189   | 0.90 (0.65, 1.25) | 0.523   |
| <b>Postnatal Mortality (1–11 months)</b>                     |                       |                  |                   |         |                   |         |
| <b>Combination of IFA supplementation and TT vaccination</b> |                       |                  |                   |         |                   |         |
| No IFA supplements with < 2 TT injections                    | 5422                  | 70               | 1.00              |         | 1.00              |         |
| No IFA supplements with ≥ 2 TT injections                    | 5687                  | 39               | 0.56 (0.38, 0.82) | 0.003   | 0.56 (0.38, 0.83) | 0.004   |
| IFA supplements with < 2 TT injections                       | 1791                  | 22               | 0.83 (0.51, 1.36) | 0.469   | 0.76 (0.45, 1.28) | 0.302   |
| IFA supplements with ≥ 2 TT injections                       | 3638                  | 23               | 0.40 (0.25, 0.66) | <0.001  | 0.37 (0.22, 0.63) | <0.001  |
| <b>Combination of ANC and IFA supplementation</b>            |                       |                  |                   |         |                   |         |
| No ANC and no IFA supplements                                | 5586                  | 78               | 1.00              |         | 1.00              |         |
| ANC without IFA supplements                                  | 5546                  | 31               | 0.40 (0.27, 0.60) | <0.001  | 0.66 (0.43, 1.01) | 0.057   |
| IFA supplements alone                                        | 1002                  | 14               | 0.89 (0.49, 1.60) | 0.692   | 0.82 (0.45, 1.50) | 0.516   |
| ANC including IFA supplements                                | 4427                  | 31               | 0.40 (0.26, 0.62) | <0.001  | 0.51 (0.32, 0.81) | 0.005   |
| <b>Child Mortality (1–4 years)</b>                           |                       |                  |                   |         |                   |         |
| <b>Combination of IFA supplementation and TT vaccination</b> |                       |                  |                   |         |                   |         |
| No IFA supplements with < 2 TT injections                    | 5397                  | 95               | 1.00              |         | 1.00              |         |
| No IFA supplements with ≥ 2 TT injections                    | 5669                  | 56               | 0.59 (0.43, 0.82) | 0.002   | 0.59 (0.42, 0.83) | 0.002   |
| IFA supplements with < 2 TT injections                       | 1789                  | 24               | 0.69 (0.43, 1.09) | 0.111   | 0.66 (0.41, 1.07) | 0.094   |
| IFA supplements with ≥ 2 TT injections                       | 3625                  | 35               | 0.48 (0.32, 0.71) | <0.001  | 0.45 (0.29, 0.70) | <0.001  |
| <b>Combination of ANC and IFA supplementation</b>            |                       |                  |                   |         |                   |         |
| No ANC and no IFA supplements                                | 5562                  | 101              | 1.00              |         | 1.00              |         |
| ANC without IFA supplements                                  | 5527                  | 50               | 0.46 (0.33, 0.65) | <0.001  | 0.77 (0.54, 1.11) | 0.161   |
| IFA supplements alone                                        | 998                   | 17               | 0.84 (0.49, 1.42) | 0.512   | 0.79 (0.46, 1.36) | 0.400   |
| ANC including IFA supplements                                | 4416                  | 42               | 0.43 (0.30, 0.62) | <0.001  | 0.57 (0.38, 0.84) | 0.005   |

IFA: Iron-folic acid supplementation; TT: tetanus toxoid; ANC: Antenatal care; AOR: Adjusted Odds ratio

<https://doi.org/10.1371/journal.pone.0187090.t003>

IFA supplementation to pregnant women should be promoted and supported at all levels of the healthcare system in Bangladesh. Efforts are being made by many organisations in Bangladesh to encourage routine use of IFA supplementation for pregnant women. For example, the Micronutrient Initiative (MI) in Bangladesh is one of the non-governmental organisation which strives to increase the number of pregnant women receiving appropriate IFA supplements [25]. A key aspect of the MI is to ensure that pregnant women in hard-to-reach areas receive micronutrient supplements to improve women and newborn survival and health.

In the study, we found a protective effect against neonatal, postnatal and child mortality from ANC TT vaccination (two or more vaccinations) compared to IFA supplementation

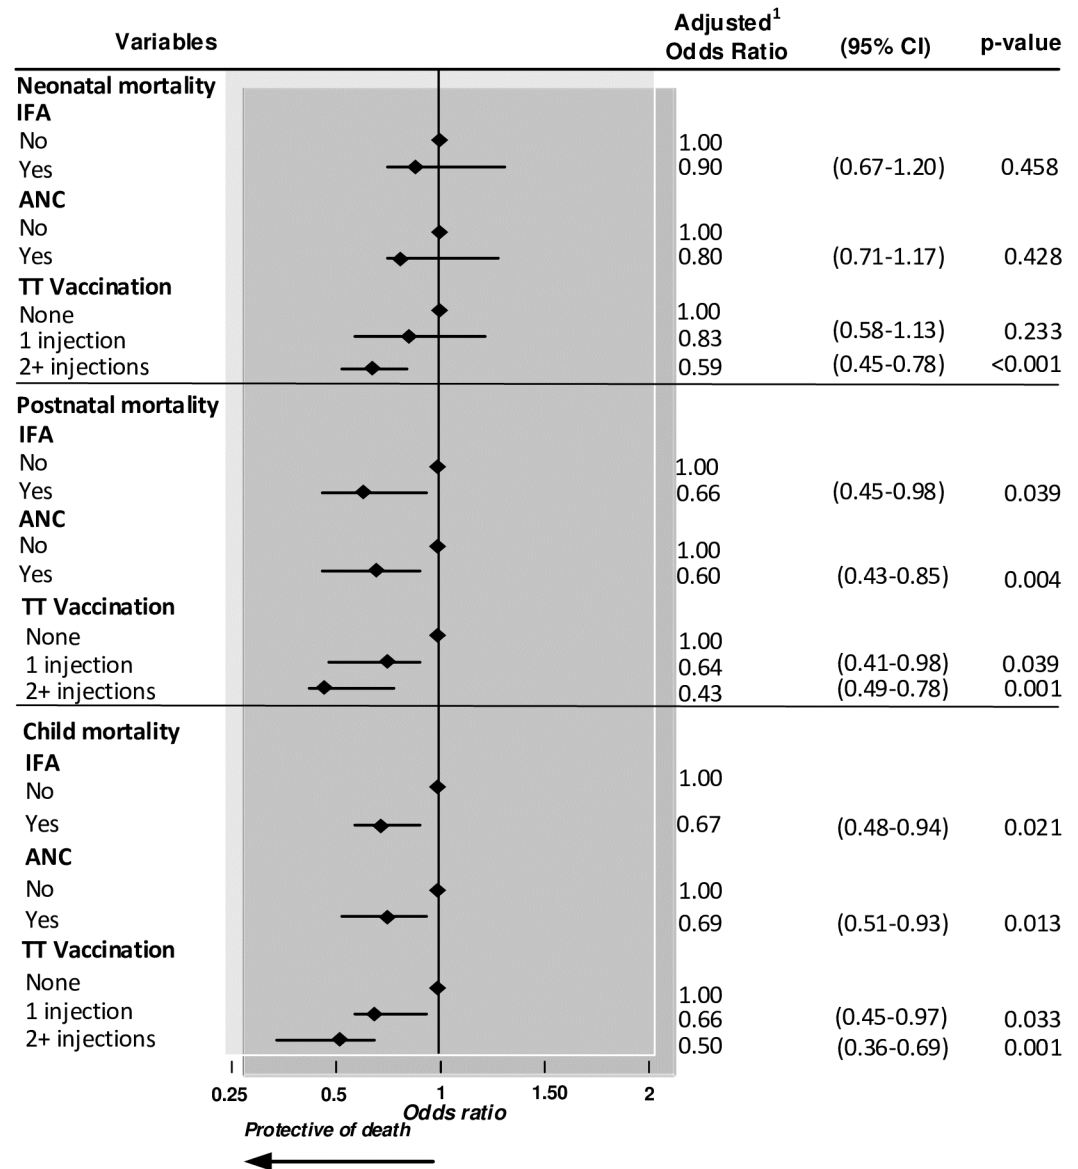

**Fig 1. Impact of antenatal care, iron-folic acid supplementation and tetanus toxoid vaccination on child mortality in Bangladesh (2004–2011).** Adjusted for place of residence, region; maternal marital status, mother’s age at interview, mothers age at child’s birth, mother working status, mother BMI, parents employment status; maternal highest level of education; paternal highest level of education; household wealth Index; watches television every week; listens to radio every week; read newspaper; sex of the baby; previous birth rank and birth interval, and desire for pregnancies. TT—tetanus toxoid; IFA—Iron-folic acid supplementation; ANC—antenatal care.

<https://doi.org/10.1371/journal.pone.0187090.g001>

alone, consistent with published reports [26–28]. This finding suggests that pregnant women should, therefore, be encouraged to take TT vaccinations in combination with IFA supplementation, which is part of the standard approach to ANC. In Bangladesh, a recent report has indicated that infant mortality rate fell from 87 per 1,000 in 1990 to 43 per 1,000 live births in 2011, and U5M rate declined substantially from 151 per 1,000 to 53 per 1,000 live births over the same period. These improvements have been attributed to improved coverage of effective childhood initiatives to prevent or treat the common causes of U5M and improvements in the socioeconomic status of the Bangladeshi populations [29]. The interventions that played

significant roles in reducing U5M in Bangladesh included improved coverage of childhood immunisation; effective treatment of diarrhoeal diseases and upper respiratory tract infections; improvements in breastfeeding status; and strategic implementation of integrated management of childhood illness. Other important contributing factors to reduced U5M included improved female education, increased health system strengthening and investment and strong political will to improve maternal and child health in the country [29].

Sustainable Development Goal-3.2 (SDG-3.2) aims to end preventable deaths of newborns and children under 5 years of age, with all countries aiming to reduce neonatal mortality to at least as low as 12 deaths per 1,000 live births and under-5 mortality to at least as low as 25 deaths per 1,000 live births by 2030 [30]. Although the number of under-5 mortality has decreased in Bangladesh since 1990, accelerated and sustained progress would be made by implementing timely, evidenced-based and context-specific interventions [1, 18]. Those initiatives may include increasing universal access to appropriate ANC [31]; promoting childhood immunisation [32]; access to potable water and sanitary environment; exclusive breastfeeding [33, 34] and implementation of Global strategic initiatives such as the drowning prevention intervention [21].

The study showed that higher maternal educational level was associated with a lower likelihood of neonatal, postnatal and child mortality, consistent with evidence from Nigeria [35]. The analyses also indicated that maternal employment was associated with a higher likelihood of child mortality. Detail information on the determinants of child mortality in Bangladesh has been described elsewhere [36]. In addition to ensuring that women have appropriate ANC services in Bangladesh, other key aspects of the SDGs—Goal 1, 2 and 4, which advocate for ending poverty, no hunger and improving quality education, respectively—would have a positive impact on child survival and health in Bangladesh. Furthermore, evidence has shown that people who adhere to recommended treatment or health messages have better health outcomes compared to those who do not comply with treatment or health messages [37–39]. Therefore, health, education, socio-economic and other government and non-government agencies in Bangladesh must work together towards the achievement of the SDGs and should draw on experiences and capability from the MDGs implementation to further accelerate reductions in child mortality.

The study has several strengths. First, it was based on nationally representative surveys and utilised three different Bangladesh DHS datasets, consisting of a large sample size. Second, the data analysed were restricted to information of each mother's latest birth, five years prior to each survey. This restriction enhanced the validity of the analysis and also minimised recall bias, consistent with previous reports [40, 41]. Third, the substantial sample size made it possible to examine the effects of the main preventive interventions on mortality; notably, ANC services, IFA supplementation and TT vaccinations, and the combination of these factors, while controlling for community, socio-economic and proximate factors.

Some limitations of our study are worthy of note. First, reports from mothers could not be validated. That notwithstanding, child mortality has been a core feature in the various DHS programmes, and there has been a careful examination of methods used in the survey for many years [42]. Second, report of usage of IFA supplementation during pregnancy and other ANC services by a mother was based on her recall; consequently, we could not assess any improvement in her iron status or information on other services that the mother may have received during the antenatal visits. This may lead to under- or over-estimation of the association between the exposure variables and outcome measures. Third, there could be an underestimation of these mortalities because both the history of birth and infant/child survival data were obtained only from surviving mothers [41]. Fourth, data on the cause of death were not available, information that would have provided an opportunity for targeted and context-

specific intervention. Nonetheless, detailed information on cause-specific mortality in Bangladesh has been reported in detail elsewhere [43].

## Conclusion

Our study found that a combination of IFA supplementation and ANC TT vaccination were protective against postnatal and child mortality in Bangladesh. The study also found that a minimum of two ANC TT vaccinations was protective against neonatal, postnatal and child mortality and, as a single intervention, conferred greater protection across all age groups compared to no IFA supplementation and less than two ANC TT vaccination. In Bangladesh, considerable gains could be achieved in improving child survival and extend the longevity of life through ensuring universal access to appropriate ANC, promotion of TT vaccination during pregnancy and IFA supplementation in pregnant women.

## Acknowledgments

The authors are grateful to Measure DHS/ICF International for providing the data for the analysis.

## Author Contributions

**Conceptualization:** Tanvir Abir, Kingsley Emwinyore Agho.

**Data curation:** Tanvir Abir, Kingsley Emwinyore Agho.

**Formal analysis:** Tanvir Abir, Kingsley Emwinyore Agho.

**Methodology:** Felix Akpojene Ogbo, Kingsley Emwinyore Agho.

**Resources:** Felix Akpojene Ogbo, Garry John Stevens, Andrew Nicolas Page, Abul Hasnat Milton, Kingsley Emwinyore Agho.

**Software:** Tanvir Abir, Kingsley Emwinyore Agho.

**Supervision:** Andrew Nicolas Page, Abul Hasnat Milton, Kingsley Emwinyore Agho.

**Writing – original draft:** Tanvir Abir, Felix Akpojene Ogbo, Kingsley Emwinyore Agho.

**Writing – review & editing:** Felix Akpojene Ogbo, Garry John Stevens, Andrew Nicolas Page, Abul Hasnat Milton, Kingsley Emwinyore Agho.

## References

1. Wang H, Bhutta ZA, Coates MM, Coggeshall M, Dandona L, Diallo K, et al. Global, regional, national, and selected subnational levels of stillbirths, neonatal, infant, and under-5 mortality, 1980–2015: a systematic analysis for the Global Burden of Disease Study 2015. *The Lancet*. 2016; 388(10053):1725–74.
2. Khan AA, Zahidie A, Rabbani F. Interventions to reduce neonatal mortality from neonatal tetanus in low and middle income countries—a systematic review. *BMC Public Health*. 2013; 13(1):322.
3. Jokhio AH, Winter HR, Cheng KK. An intervention involving traditional birth attendants and perinatal and maternal mortality in Pakistan. *New England Journal of Medicine*. 2005; 352(20):2091–9. <https://doi.org/10.1056/NEJMsa042830> PMID: 15901862
4. Blencowe H, Lawn J, Vandelaer J, Roper M, Cousens S. Tetanus toxoid immunization to reduce mortality from neonatal tetanus. *International journal of epidemiology*. 2010; 39(suppl 1):i102–i9.
5. Lamberti LM, Walker C, Fischer L, Noiman A, Victora C, Black RE. Breastfeeding and the risk for diarrhea morbidity and mortality. *BMC public health*. 2011; 11(Suppl 3):S15.
6. West KP, Shamim AA, Mehra S, Labrique AB, Ali H, Shaikh S, et al. Effect of Maternal Multiple Micronutrient vs Iron–Folic Acid Supplementation on Infant Mortality and Adverse Birth Outcomes in Rural Bangladesh: The JiVitA-3 Randomized Trial. *JAMA*. 2014; 312(24):2649–58. <https://doi.org/10.1001/jama.2014.16819> PMID: 25536256

7. Pervin J, Moran A, Rahman M, Razzaque A, Sibley L, Streatfield PK, et al. Association of antenatal care with facility delivery and perinatal survival—a population-based study in Bangladesh. *BMC pregnancy and childbirth*. 2012; 12(1):111.
8. Rahman A, Nisha MK, Begum T, Ahmed S, Alam N, Anwar I. Trends, determinants and inequities of 4+ ANC utilisation in Bangladesh. *Journal of Health, Population and Nutrition*. 2017; 36(1):2. <https://doi.org/10.1186/s41043-016-0078-5> PMID: 28086970
9. Singh A, Pallikadavath S, Ogollah R, Stones W. Maternal tetanus toxoid vaccination and neonatal mortality in rural north India. *PLoS one*. 2012; 7(11):e48891. <https://doi.org/10.1371/journal.pone.0048891> PMID: 23152814
10. Darmstadt GL, Bhutta ZA, Cousens S, Adam T, Walker N, De Bernis L, et al. Evidence-based, cost-effective interventions: how many newborn babies can we save? *The Lancet*. 2005; 365(9463):977–88.
11. Black RE, Huber D, Curlin GT. Reduction of neonatal tetanus by mass immunization of non-pregnant women: duration of protection provided by one or two doses of aluminium-adsorbed tetanus toxoid. *Bulletin of the World Health Organization*. 1980; 58(6):927. PMID: 6971190
12. National Institute of Population Research and Training (NIPORT) MaA, and ORC Macro,. Bangladesh Demographic and Health Survey 2004. Dhaka, Bangladesh and Calverton, Maryland [USA]: National Institute of Population Research and Training, Mitra and Associates, and ORC Macro, 2005.
13. National Institute of Population Research and Training (NIPORT), Mitra and Associates, Macro International. Bangladesh Demographic and Health Survey 2007. Dhaka, Bangladesh and Calverton, Maryland, USA: National Institute of Population Research and Training, Mitra and Associates, and Macro International, 2009.
14. National Institute of Population Research and Training (NIPORT), Mitra and Associates, ICF International. Bangladesh Demographic and Health Survey 2011. Dhaka, Bangladesh and Calverton, Maryland, USA: NIPORT, Mitra and Associates, and ICF International., 2013.
15. Mosley WH, Chen LC. An analytical framework for the study of child survival in developing countries. *Population and development review*. 1984:25–45.
16. Alam N. Teenage motherhood and infant mortality in Bangladesh: maternal age-dependent effect of parity one. *Journal of biosocial science*. 2000; 32(2):229–36. PMID: 10765612
17. World Health Organisation. *The World health report: Make every mother and child count*. Geneva: WHO, 2005.
18. United Nations. *The Millennium Development Goals Report 2015*. New York: United Nations, 2015.
19. Ronsmans C, Chowdhury ME, Alam N, Koblinsky M, Arifeen SE. Trends in stillbirths, early and late neonatal mortality in rural Bangladesh: the role of public health interventions. *Paediatric and perinatal epidemiology*. 2008; 22(3):269–79. <https://doi.org/10.1111/j.1365-3016.2008.00939.x> PMID: 18426522
20. Rahman AS, Islam MR, Koehlmoos TP, Raihan MJ, Hasan MM, Ahmed T, et al. Impact of NGO Training and Support Intervention on Diarrhoea Management Practices in a Rural Community of Bangladesh: An Uncontrolled, Single-Arm Trial. *PLoS one*. 2014; 9(11):e112308. <https://doi.org/10.1371/journal.pone.0112308> PMID: 25398082
21. Hyder AA, Alonge O, He S, Wadhvaniya S, Rahman F, Rahman A, et al. A framework for addressing implementation gap in global drowning prevention interventions: experiences from Bangladesh. *Journal of health, population, and nutrition*. 2014; 32(4):564. PMID: 25895188
22. Zeng L, Cheng Y, Dang S, Yan H, Dibley MJ, Chang S, et al. Impact of micronutrient supplementation during pregnancy on birth weight, duration of gestation, and perinatal mortality in rural western China: double blind cluster randomised controlled trial. *Bmj*. 2008; 337.
23. Titaley CR, Dibley MJ, Roberts CL, Hall J, Agho K. Iron and folic acid supplements and reduced early neonatal deaths in Indonesia. *Bulletin of the World Health Organization*. 2010; 88(7):500–8. <https://doi.org/10.2471/BLT.09.065813> PMID: 20616969
24. World Health Organization. *Iron deficiency anaemia: assessment, prevention and control: a guide for programme managers*. Geneva: WHO, 2001.
25. Nutrition International. *Women's and Newborn Survival and Health in Bangladesh Online: Nutrition International 2017* [cited 2017 16 May]. <http://www.nutritionintl.org/in-the-world/asia/bangladesh/>.
26. Tall F, Prazuck T, Roisin A, Sanou J, Nacro B, Traore A, et al. [Risk factors for neonatal tetanus in western Burkina Faso. Case-control study]. *Bulletin de la Societe de pathologie exotique* (1990). 1990; 84(5 Pt 5):558–61.
27. Gitta SN, Wabwire-Mangen F, Kitimbo D, Pariyo G. Risk factors for neonatal tetanus—Busoga region, Uganda, 2002–2003. *MMWR Morb Mortal Wkly Rep*. 2006; 55(Suppl 1):25–30.
28. Chai F, Prevots DR, Wang X, Birmingham M, Zhang R. Neonatal tetanus incidence in China, 1996–2001, and risk factors for neonatal tetanus, Guangxi Province, China. *International journal of epidemiology*. 2004; 33(3):551–7. <https://doi.org/10.1093/ije/dyh073> PMID: 15155708



29. Ministry of Health and Family Welfare, World Health Organisation, World Bank, Alliance for Health Policy and Systems Research. Success Factors for Women's and Children's Health. Bangladesh: Ministry of Health and Family Welfare, 2015.
30. United Nations. Sustainable Development—knowledge platform: United Nations; 2017 [cited 2017 16 May]. <https://sustainabledevelopment.un.org/sdg3>.
31. Basinga P, Gertler PJ, Binagwaho A, Soucat AL, Sturdy J, Vermeersch CM. Effect on maternal and child health services in Rwanda of payment to primary health-care providers for performance: an impact evaluation. *The Lancet*. 2011; 377(9775):1421–8.
32. Tate JE, Burton AH, Boschi-Pinto C, Steele AD, Duque J, Parashar UD. 2008 estimate of worldwide rotavirus-associated mortality in children younger than 5 years before the introduction of universal rotavirus vaccination programmes: a systematic review and meta-analysis. *The Lancet infectious diseases*. 2012; 12(2):136–41. [https://doi.org/10.1016/S1473-3099\(11\)70253-5](https://doi.org/10.1016/S1473-3099(11)70253-5) PMID: 22030330
33. Victora CG, Bahl R, Barros AJ, França GV, Horton S, Krasevec J, et al. Breastfeeding in the 21st century: epidemiology, mechanisms, and lifelong effect. *The Lancet*. 2016; 387(10017):475–90.
34. Ogbo FA, Page A, Idoko J, Claudio F, Agho KE. Diarrhoea and suboptimal feeding practices in Nigeria: evidence from the national household surveys. *Paediatric and Perinatal Epidemiology*. 2016; 30:346–55. <https://doi.org/10.1111/ppe.12293> PMID: 27009844
35. Ezeh OK, Agho KE, Dibley MJ, Hall JJ, Page AN. Risk factors for postneonatal, infant, child and under-5 mortality in Nigeria: a pooled cross-sectional analysis. *BMJ open*. 2015; 5(3):e006779. <https://doi.org/10.1136/bmjopen-2014-006779> PMID: 25818271
36. Abir T, Agho KE, Page AN, Milton AH, Dibley MJ. Risk factors for under-5 mortality: evidence from Bangladesh Demographic and Health Survey, 2004–2011. *BMJ open*. 2015; 5(8):e006722. <https://doi.org/10.1136/bmjopen-2014-006722> PMID: 26297357
37. Martin LR, Williams SL, Haskard KB, DiMatteo MR. The challenge of patient adherence. *Therapeutics and clinical risk management*. 2005; 1(3):189. PMID: 18360559
38. Stewart MA. Effective physician-patient communication and health outcomes: a review. *CMAJ: Canadian Medical Association Journal*. 1995; 152(9):1423. PMID: 7728691
39. Jin J, Sklar GE, Oh VMS, Li SC. Factors affecting therapeutic compliance: A review from the patient's perspective. *Therapeutics and clinical risk management*. 2008; 4(1):269. PMID: 18728716
40. Hill K, Choi Y. Neonatal mortality in the developing world. *Demographic research*. 2006; 14(18):429–52.
41. Mahy M. Childhood mortality in the developing world: a review of evidence from the Demographic and Health Surveys: MEASURE DHS+, ORC Macro; 2003.
42. Curtis SL. Assessment of the quality of data used for direct estimation of infant and child mortality in DHS-II surveys. 1995.
43. Wang H, Naghavi M, Allen C, Barber RM, Bhutta ZA, Carter A, et al. Global, regional, and national life expectancy, all-cause mortality, and cause-specific mortality for 249 causes of death, 1980–2015: a systematic analysis for the Global Burden of Disease Study 2015. *The Lancet*. 2016; 388(10053):1459–544.
